# Supplementary material for: The triple variable index combines information generated over time from common monitoring variables to identify patients expressing distinct patterns of intraoperative physiology
Source: Springer Nature journal article supplement (doi:10.1186/s12874-019-0660-9), 2019-01-14

**1. Surgery ID Raw Data Z-Scores Profile Window**

| OR.Case.Number | Time           | BIS  | MAP | MAC   | BIS_Z | MAP_Z  | MAC_Z  | Window_Number |
|----------------|----------------|------|-----|-------|-------|--------|--------|---------------|
| XXX_2013_12345 | 01/22/14 07:54 | NA   | NA  | NA    | NA    | NA     | NA     | 1             |
| XXX_2013_12345 | 01/22/14 07:55 | NA   | NA  | NA    | NA    | NA     | NA     | 1             |
| XXX_2013_12345 | 01/22/14 07:56 | NA   | 108 | NA    | NA    | 1.451  | NA     | 1             |
| XXX_2013_12345 | 01/22/14 07:58 | NA   | 88  | NA    | NA    | 0.311  | NA     | 1             |
| XXX_2013_12345 | 01/22/14 08:00 | NA   | NA  | NA    | NA    | NA     | NA     | 1             |
| XXX_2013_12345 | 01/22/14 08:01 | NA   | 68  | NA    | NA    | -0.83  | NA     | 2             |
| XXX_2013_12345 | 01/22/14 08:03 | NA   | 133 | NA    | NA    | 2.877  | NA     | 2             |
| XXX_2013_12345 | 01/22/14 08:04 | NA   | 113 | NA    | NA    | 1.737  | NA     | 2             |
| XXX_2013_12345 | 01/22/14 08:05 | NA   | NA  | 0.328 | NA    | NA     | -1.724 | 2             |
| XXX_2013_12345 | 01/22/14 08:06 | NA   | 92  | NA    | NA    | 0.539  | NA     | 2             |
| XXX_2013_12345 | 01/22/14 08:08 | NA   | 88  | NA    | NA    | 0.311  | NA     | 3             |
| XXX_2013_12345 | 01/22/14 08:10 | NA   | 92  | 0.367 | NA    | 0.539  | -1.588 | 3             |
| XXX_2013_12345 | 01/22/14 08:13 | NA   | 75  | NA    | NA    | -0.431 | NA     | 3             |
| XXX_2013_12345 | 01/22/14 08:15 | 66   | 101 | 0.384 | 2.326 | 1.052  | -1.53  | 3             |
| XXX_2013_12345 | 01/22/14 08:18 | NA   | 105 | NA    | NA    | 1.28   | NA     | 3             |
| XXX_2013_12345 | 01/22/14 08:20 | 45.2 | 77  | 0.378 | 0.365 | -0.317 | -1.549 | 4             |
| XXX_2013_12345 | 01/22/14 08:24 | NA   | 85  | NA    | NA    | 0.14   | NA     | 4             |
| XXX_2013_12345 | 01/22/14 08:25 | 45   | NA  | 0.961 | 0.346 | NA     | 0.493  | 4             |
| XXX_2013_12345 | 01/22/14 08:26 | NA   | 76  | NA    | NA    | -0.374 | NA     | 4             |
| XXX_2013_12345 | 01/22/14 08:28 | NA   | 79  | NA    | NA    | -0.203 | NA     | 4             |

**2. Mean Z-scores within each profile window Sum of mean Z-scores**

| OR.Case.Number | Window_Number | BIS_Z_Aver | MAP_Z_Aver | MAC_Z_Aver | TVI_Value |
|----------------|---------------|------------|------------|------------|-----------|
| XXX_2013_12345 | 1             | NA         | 0.881      | NA         | NA        |
| XXX_2013_12345 | 2             | NA         | 1.081      | -1.724     | NA        |
| XXX_2013_12345 | 3             | 2.326      | 0.550      | -1.559     | 1.317     |
| XXX_2013_12345 | 4             | 0.356      | -0.188     | -0.528     | -0.361    |

**3. TVI Profile for surgery XXX\_2013\_12345**

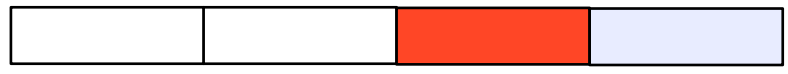

| Window #  | 1  | 2  | 3     | 4      |
|-----------|----|----|-------|--------|
| TVI Value | NA | NA | 1.317 | -0.361 |

**4. Figure 2**

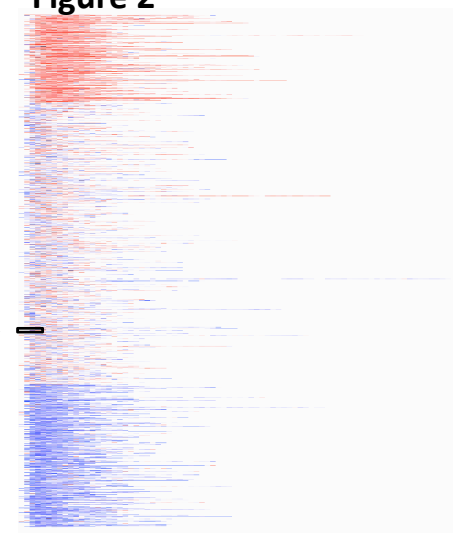

Supplement: MOESM2 [file 16396274]
