# Supplementary material for: The triple variable index combines information generated over time from common monitoring variables to identify patients expressing distinct patterns of intraoperative physiology
Source: Springer Nature journal article supplement (doi:10.1186/s12874-019-0660-9), 2019-01-14
Supplement: MOESM1 [file 16396274]

| <b>Variable</b>     | <b>Observed Population</b> | <b>TVI Population</b> |
|---------------------|----------------------------|-----------------------|
| Total Surgeries     | 16104                      | 5296                  |
| Mean MAP, mmHg (SD) | 82.6 (17.5)                | 81.5 (17.2)           |
| Mean BIS (SD)       | 41.3 (10.6)                | 41.3 (10.4)           |
| Mean MAC (SD)       | 0.821 (0.29)               | 0.808 (0.29)          |
