# Supplementary material for: The triple variable index combines information generated over time from common monitoring variables to identify patients expressing distinct patterns of intraoperative physiology
Source: Springer Nature journal article supplement (doi:10.1186/s12874-019-0660-9), 2019-01-14
Supplement: MOESM3 [file 16396274]

| <b>Variable</b> | <b>ALL Profiles</b> | <b>Elevated TVI</b> | <b>Mixed TVI</b> | <b>Depressed TVI</b> |
|-----------------|---------------------|---------------------|------------------|----------------------|
| Total profiles  | 5296                | 891                 | 2931             | 1474                 |
| MAP-MAC         | -0.09               | -0.20               | -0.23            | -0.13                |
| BIS-MAC         | -0.24               | -0.43               | -0.45            | -0.42                |
| MAP-BIS         | 0.07                | -0.09               | 0.00             | 0.02                 |
