# Supplementary material for: The triple variable index combines information generated over time from common monitoring variables to identify patients expressing distinct patterns of intraoperative physiology
Source: Springer Nature journal article supplement (doi:10.1186/s12874-019-0660-9), 2019-01-14
Supplement: MOESM4 [file 16396274]

| <b>Variable</b>                                | <b>Elevated TVI</b> | <b>Mixed TVI</b>      | <b>Depressed TVI</b>  |
|------------------------------------------------|---------------------|-----------------------|-----------------------|
| Total profiles                                 | 891                 | 2931                  | 1474                  |
| % Non-cardiac surgery (95% CI)                 | 97.8 (96.5-98.6)    | 93.5 (92.5-94.4)      | 83.9 (81.9-85.7)      |
| % Cardiac surgery without CPB (95% CI)         | 1.9 (1.2-3.1)       | 3.9 (3.2-4.7)         | 6.3 (5.1-7.7)         |
| % Cardiac surgery with CPB (95% CI)            | 0.3 (0.1-1.1)       | 2.6 (2.1-3.3)         | 9.8 (8.3-11.4)        |
| All surgeries- Mean TVI (95% CI)               | 1.21 (1.19-1.23)    | 0.01 (-0.01-0.02)     | -1.25 (-1.27-(-1.24)) |
| Non-cardiac surgery-Mean TVI (95% CI)          | 1.22 (1.20-1.23)    | 0.03 (0.02-0.04)      | -1.20 (-1.22-(-1.19)) |
| Cardiac surgery without CPB- Mean TVI (95% CI) | 0.98 (0.85-1.10)    | -0.17 (-0.25-(-0.10)) | -1.36 (-1.43-(-1.30)) |
| Cardiac surgery with CPB- Mean TVI (95% CI)    | 0.83 (0.06-1.59)    | -0.53 (-0.62-(-0.45)) | -1.60 (-1.66-(-1.54)) |
