# Supplementary material for: The triple variable index combines information generated over time from common monitoring variables to identify patients expressing distinct patterns of intraoperative physiology
Source: Springer Nature journal article supplement (doi:10.1186/s12874-019-0660-9), 2019-01-14
Supplement: MOESM5 [file 16396274]

| <b>Variable</b>            | <b>Elevated TVI</b> | <b>Mixed TVI</b> | <b>Depressed TVI</b> |
|----------------------------|---------------------|------------------|----------------------|
| Total Profiles             | 891                 | 2931             | 1474                 |
| % Midazolam (95% CI)       | 86.2 (83.7-88.4)    | 81.7 (80.2-83.1) | 83.0 (81.0-84.9)     |
| % Propofol (95% CI)        | 99.7 (98.9-99.9)    | 99.0 (98.6-99.3) | 98.1 (97.2-98.7)     |
| % Etomidate (95% CI)       | 3.0 (2.0-4.4)       | 7.3 (6.4-8.3)    | 12.6 (10.9-14.4)     |
| % Fentanyl (95% CI)        | 98.2 (97.0-98.9)    | 97.1 (96.4-97.6) | 97.4 (96.4-98.1)     |
| % Remifentanyl (95% CI)    | 5.2 (3.8-6.9)       | 6.1 (5.3-7.1)    | 8.5 (7.1-10.0)       |
| % Hydromorphone (95% CI)   | 47.6 (44.3-50.9)    | 26.3 (24.8-28.0) | 25.2 (23.1-27.6)     |
| % Morphine (95% CI)        | 1.3 (1.0-2.4)       | 1.1 (0.8-1.6)    | 0.9 (0.5-1.5)        |
| % Ketamine (95% CI)        | 11.2 (9.3-13.5)     | 4.6 (3.9-5.4)    | 3.0 (2.2-4.0)        |
| % Dexmedetomidine (95% CI) | 18.4 (15.9-21.1)    | 16.6 (15.3-18.0) | 13.6 (11.9-15.4)     |
| % Ephedrine (95% CI)       | 61.5 (58.2-64.7)    | 58.9 (57.0-60.6) | 59.2 (56.7-61.7)     |
| % Phenylephrine (95% CI)   | 74.0 (70.9-76.8)    | 74.8 (73.2-76.3) | 83.0 (81.0-84.9)     |
| % Epinephrine (95% CI)     | 2.0 (1.2-3.2)       | 6.0 (5.2-7.0)    | 18.0 (16.1-20.1)     |
| % Norepinephrine (95% CI)  | 2.4 (1.5-3.6)       | 7.5 (6.6-8.6)    | 21.2 (19.2-23.4)     |
| % Vasopressin (95% CI)     | 3.4 (2.3-4.8)       | 7.6 (6.7-8.6)    | 21.0 (19.0-23.2)     |
| % Succinylcholine (95% CI) | 74.0 (70.9-76.8)    | 69.0 (67.3-70.7) | 61.9 (59.4-64.4)     |
| % Rocuronium (95% CI)      | 90.2 (88.0-92.1)    | 86.1 (84.8-87.3) | 88.7 (86.9-90.2)     |
| % Cisatracurium (95% CI)   | 4.2 (3.0-5.7)       | 3.8 (3.2-4.6)    | 5.7 (4.6-7.0)        |

**Additional Table 4.**
