# Supplementary material for: The triple variable index combines information generated over time from common monitoring variables to identify patients expressing distinct patterns of intraoperative physiology
Source: Springer Nature journal article supplement (doi:10.1186/s12874-019-0660-9), 2019-01-14
Supplement: MOESM6 [file 16396274]

| <b>Variable</b>              | <b>Elevated TVI</b> | <b>Mixed TVI</b> | <b>Depressed TVI</b> |
|------------------------------|---------------------|------------------|----------------------|
| Midazolam, mg (Q1-Q3)        | 2 (2-2)             | 2 (2-2)          | 2 (2-2)              |
| Propofol, mg (Q1-Q3)         | 185 (143-200)       | 160 (120-200)    | 150 (109-200)        |
| Etomidate, mg (Q1-Q3)        | 20 (19-24)          | 20 (16-24)       | 20 (14-20)           |
| Fentanyl, mcg (Q1-Q3)        | 250 (250-450)       | 250 (150-300)    | 250 (150-400)        |
| Remifentanyl, mcg (Q1-Q3)    | 3769 (2103-5791)    | 3199 (1864-4959) | 3025 (1615-4452)     |
| Hydromorphone, mg (Q1-Q3)    | 2.0 (1.0-3.2)       | 1.6 (1.0-2.8)    | 1.6 (1.0-3.0)        |
| Morphine, mg (Q1-Q3)         | 10 (5-14)           | 6 (4-10)         | 7 (4-10)             |
| Ketamine, mg (Q1-Q3)         | 50 (30-70)          | 30 (20-50)       | 50 (30-60)           |
| Dexmedetomidine, mcg (Q1-Q3) | 28 (16-40)          | 30 (20-40)       | 32 (19-40)           |
| Ephedrine, mg (Q1-Q3)        | 10 (0-25)           | 10 (0-20)        | 10 (0-20)            |
| Phenylephrine, mcg (Q1-Q3)   | 400 (80-1520)       | 400 (80-1120)    | 480 (160-1360)       |
| Epinephrine, mcg (Q1-Q3)     | 45 (20-198)         | 173 (25-594)     | 447 (60-1002)        |
| Norepinephrine, mcg (Q1-Q3)  | 850 (265-1852)      | 493 (217-1279)   | 664 (237-1597)       |
| Vasopressin, Units (Q1-Q3)   | 4 (2-8)             | 4 (2-8)          | 6 (3-13)             |
| Succinylcholine, mg (Q1-Q3)  | 160 (140-200)       | 160 (120-200)    | 140 (120-200)        |
| Rocuronium, mg (Q1-Q3)       | 85 (50-130)         | 60 (35-100)      | 80 (50-130)          |
| Cisatracurium, mg (Q1-Q3)    | 30 (14-40)          | 20 (10-31)       | 24 (14-40)           |
